# Supplementary material
Source: publisher site journal article supplement (https://www.dovepress.com/article/329706)

Table S1 The association between an increase of 10ug/m3 of NO2 and gout hospital admission in Anqing, 2016-2020

| **Single-day** | **Relative risk (95%, confidence interval)** | **Multi-day** | **Relative risk (95%, confidence interval)** |
| --- | --- | --- | --- |
| 0 | 1.022(1.004-1.041) * | 0-0 | 1.022(1.004-1.041) * |
| 1 | 1.013(1.003-1.022) * | 0-1 | 1.035(1.008-1.063) * |
| 2 | 1.005(0.997-1.014) | 0-2 | 1.041(1.010-1.072) * |
| 3 | 1.001(0.992-1.010) | 0-3 | 1.042(1.010-1.076) * |
| 4 | 1.000(0.992-1.009) | 0-4 | 1.042(1.007-1.079) * |
| 5 | 1.001(0.994-1.008) | 0-5 | 1.043(1.006-1.082) * |
| 6 | 1.003(0.995-1.012) | 0-6 | 1.047(1.008-1.087) * |
| 7 | 1.006(0.992-1.020) | 0-7 | 1.053(1.010-1.098) * |

In NO2 model, PM2.5, PM10, SO2, relative humidity, long-term trend, day of week and public holidays were adjusted.

∗: *P* < 0.05.

Table S2 The association between an increase of 10ug/m3 of NO2 and gout hospital admission in different subgroups (relative risk and 95% confidence interval)

| **lag** | **Male** | **Female** | **Aged<65 years** | **Aged≥65 years** | **Warm season** | **Cold season** |
| --- | --- | --- | --- | --- | --- | --- |
| 0 | 1.022(1.003-1.042) * | 1.023(0.970-1.078) | 1.019(0.996-1.041) | 1.028(0.999-1.057) | 0.994(0.969-1.019) | 1.024(1.003-1.044) * |
| 1 | 1.012(1.002-1.022) * | 1.018(0.990-1.047) | 1.014(1.002-1.026) * | 1.010(0.995-1.025) | 0.994(0.980-1.008) | 1.014(1.003-1.024) * |
| 2 | 1.004(0.995-1.022) | 1.014(0.990-1.038) | 1.009(1.000-1.019) * | 0.998(0.985-1.010) | 0.994(0.983-1.006) | 1.006(0.997-1.014) |
| 3 | 0.999(0.990-1.009) | 1.011(0.985-1.038) | 1.006(0.995-1.017) | 0.993(0.979-1.007) | 0.996(0.983-1.009) | 1.000(0.991-1.010) |
| 4 | 0.999(0.990-1.007) | 1.010(0.986-1.034) | 1.003(0.993-1.013) | 0.995(0.982-1.008) | 0.998(0.986-1.011) | 0.997(0.989-1.006) |
| 5 | 0.999(0.993-1.006) | 1.009(0.989-1.028) | 1.000(0.992-1.008) | 1.002(0.991-1.012) | 1.001(0.991-1.012) | 0.996(0.989-1.003) |
| 6 | 1.002(0.993-1.012) | 1.008(0.983-1.034) | 0.998(0.988-1.009) | 1.011(0.998-1.025) | 1.005(0.991-1.018) | 0.996(0.987-1.005) |
| 7 | 1.006(0.991-1.021) | 1.008(0.967-1.051) | 0.996(0.979-1.013) | 1.023(1.001-1.046) * | 1.008(0.988-1.029) | 0.997(0.982-1.012) |
| 0-0 | 1.022(1.003-1.042) * | 1.023(0.970-1.078) | 1.019(0.996-1.041) | 1.028(0.999-1.057) | 0.994(0.969-1.019) | 1.024(1.003-1.044) * |
| 0-1 | 1.034(1.005-1.064) * | 1.041(0.963-1.253) | 1.033(0.999-1.067) | 1.038(0.996-1.082) | 0.987(0.950-1.026) | 1.037(1.007-1.069) * |
| 0-2 | 1.038(1.006-1.071) * | 1.056(0.968-1.151) | 1.042(1.005-1.081) * | 1.036(0.988-1.085) | 0.982(0.939-1.027) | 1.043(1.009-1.079) * |
| 0-3 | 1.038(1.003-1.073) * | 1.067(0.973-1.171) | 1.048(1.009-1.089) * | 1.028(0.979-1.081) | 0.978(0.931-1.028) | 1.044(1.007-1.082) * |
| 0-4 | 1.036(0.999-1.074) | 1.078(0.975-1.208) | 1.051(1.009-1.095) * | 1.023(0.970-1.79) | 0.977(0.924-1.032) | 1.041(1.002-1.082) * |
| 0-5 | 1.036(0.997-1.076) | 1.087(0.979-1.208) | 1.051(1.007-1.098) * | 1.025(0.969-1.084) | 0.978(0.921-1.039) | 1.037(0.996-1.080) |
| 0-6 | 1.038(0.998-1.080) | 1.096(0.978-1.223) | 1.049(1.003-1.098) * | 1.037(0.978-1.010) | 0.983(0.920-1.050) | 1.033(0.991-1.078) |
| 0-7 | 1.045(0.999-1.091) | 1.105(0.979-1.248) | 1.045(0.994-1.099) * | 1.061(0.994-1.132) | 0.991(0.919-1.068) | 1.030(0.983-1.079) |

In NO2 model, PM2.5, PM10, SO2, relative humidity, long-term trend, day of week and public holidays were adjusted.

∗: *P* < 0.05.

Table S3 The association between an increase of 10ug/m3 of O3 and gout hospital admission in Anqing, 2016-2020

| **Single-day** | **Relative risk (95%, confidence interval)** | **Multi-day** | **Relative risk (95%, confidence interval)** |
| --- | --- | --- | --- |
| 0 | 0.986(0.976-0.996) * | 0-0 | 0.986(0.976-0.996) * |
| 1 | 0.999(0.994-1.006) | 0-1 | 0.986(0.974-0.997) * |
| 2 | 1.001(0.996-1.005) | 0-2 | 0.986(0.974-0.999) * |
| 3 | 0.996(0.993-0.999) * | 0-3 | 0.983(0.970-0.996) * |
| 4 | 0.995(0.991-0.999) * | 0-4 | 0.978(0.965-0.992) * |
| 5 | 0.997(0.994-1.001) | 0-5 | 0.975(0.961-0.990) * |
| 6 | 1.001(0.998-1.004) | 0-6 | 0.977(0.962-0.992) * |
| 7 | 1.006(0.999-1.012) | 0-7 | 0.982(0.967-0.999) * |

In O3 model, CO, relative humidity, mean temperature, long-term trend, day of week and public holidays were adjusted.

∗: *P* < 0.05.

Table S4 The association between an increase of 10ug/m3 of O3 and gout hospital admission in different subgroups (relative risk and 95% confidence interval)

| **lag** | **Male** | **Female** | **Aged<65 years** | **Aged≥65 years** | **Warm season** | **Cold season** |
| --- | --- | --- | --- | --- | --- | --- |
| 0 | 0.985(0.975-0.996) * | 0.996(0.965-1.027) | 0.983(0.971-0.995) * | 0.991(0.975-1.007) | 1.000(0.990-1.012) | 0.980(0.967-0.994) * |
| 1 | 0.999(0.994-1.006) | 0.999(0.983-1.018) | 1.003(0.996-1.010) | 0.995(0.986-1.004) | 0.996(0.991-1.002) | 0.992(0.983-1.001) |
| 2 | 1.000(0.995-1.006) | 1.000(0.986-1.015) | 1.003(0.997-1.009) | 0.997(0.989-1.004) | 0.997(0.992-1.001) | 0.998(0.991-1.005) |
| 3 | 0.996(0.992-0.999) * | 1.000(0.989-1.010) | 0.996(0.992-1.000) | 0.997(0.991-1.002) | 0.998(0.995-1.002) | 1.001(0.996-1.006) |
| 4 | 0.995(0.991-0.999) * | 1.000(0.988-1.012) | 0.994(0.989-0.999) * | 0.998(0.991-1.004) | 0.999(0.995-1.004) | 1.002(0.996-1.008) |
| 5 | 0.997(0.994-1.000) | 1.001(0.991-1.011) | 0.996(0.992-1.000) | 0.999(0.994-1.005) | 0.999(0.996-1.003) | 1.001(0.996-1.006) |
| 6 | 1.001(0.998-1.004) | 1.003(0.993-1.012) | 1.001(0.997-1.005) | 1.002(0.997-1.007) | 0.999(0.996-1.002) | 0.999(0.995-1.004) |
| 7 | 1.006(1.000-1.013) | 1.004(0.986-1.023) | 1.007(1.000-1.015) | 1.004(0.994-1.014) | 0.998(0.992-1.004) | 0.997(0.989-1.006) |
| 0-0 | 0.985(0.975-0.996) * | 0.996(0.965-1.027) | 0.983(0.971-0.995) * | 0.991(0.975-1.007) | 1.000(0.990-1.012) | 0.980(0.967-0.994) * |
| 0-1 | 0.985(0.973-0.997) * | 0.996(0.961-1.031) | 0.985(0.972-0.999) * | 0.986(0.969-1.004) | 0.997(0.985-1.009) | 0.972(0.956-0.989) * |
| 0-2 | 0.985(0.972-0.999) * | 0.996(0.959-1.034) | 0.988(0.973-1.003) | 0.983(0.964-1.003) | 0.994(0.981-1.007) | 0971(0.952-0.990) * |
| 0-3 | 0.981(0.968-0.995) * | 0.996(0.958-1.035) | 0.984(0.969-0.999) * | 0.980(0.960-0.999) * | 0.992(0.979-1.006) | 0.972(0.952-0.991) * |
| 0-4 | 0.977(0.963-0.991) * | 0.995(0.956-1.037) | 0.979(0.963-0.995) * | 0.978(0.957-0.999) * | 0.992(0.978-1.006) | 0.973(0.953-0.994) * |
| 0-5 | 0.974(0.959-0.989) * | 0.997(0.955-1.041) | 0.975(0.958-0.992) * | 0.977(0.955-0.999) * | 0.991(0.976-1.006) | 0.974(0.952-0.996) * |
| 0-6 | 0.975(0.959-0.990) * | 0.999(0.956-1.045) | 0.976(0.958-0.993) * | 0.979(0.956-1.002) | 0.990(0.974-1.006) | 0.973(0.951-0.996) * |
| 0-7 | 0.981(0.964-0.997) * | 1.004(0.957-1.052) | 0.983(0.964-1.002) | 0.983(0.958-1.008) | 0.988(0.971-1.006) | 0.971(0.947-0.995) * |

In O3 model, CO, relative humidity, mean temperature, long-term trend, day of week and public holidays were adjusted.

∗: *P* < 0.05.

Table S5The association between an increase of 1mg/m3 of CO and gout hospital admission in Anqing, 2016-2020

| **Single-day** | **Relative risk (95%, confidence interval)** | **Multi-day** | **Relative risk (95%, confidence interval)** |
| --- | --- | --- | --- |
| 0 | 0.999(0.860-1.163) | 0-0 | 0.999(0.860-1.163) |
| 1 | 1.060(0.957-1.175) | 0-1 | 1.060(0.910-1.235) |
| 2 | 1.041(0.970-1.118) | 0-2 | 1.104(0.931-1.310) |
| 3 | 1.014(0.960-1.071) | 0-3 | 1.120(0.933-1.344) |
| 4 | 1.009(0.951-1.070) | 0-4 | 1.129(0.924-1.381) |
| 5 | 1.016(0.970-1.063) | 0-5 | 1.147(0.917-1.435) |
| 6 | 1.025(0.987-1.065) | 0-6 | 1.176(0.923-1.499) |
| 7 | 1.032(0.992-1.075) | 0-7 | 1.214(0.937-1.574) |
| 8 | 1.037(0.994-1.082) | 0-8 | 1.260(0.955-1.662) |
| 9 | 1.039(0.998-1.083) | 0-9 | 1.309(0.974-1.762) |
| 10 | 1.040(1.002-1.079) * | 0-10 | 1.362(0.993-1.868) |
| 11 | 1.039(1.004-1.076) * | 0-11 | 1.416(1.015-1.975) * |
| 12 | 1.037(0.997-1.079) | 0-12 | 1.468(1.036-2.080) * |
| 13 | 1.034(0.982-1.089) | 0-13 | 1.519(1.055-2.187) * |
| 14 | 1.031(0.962-1.105) | 0-14 | 1.566(1.062-2.308) * |

In CO model, SO2, O3, long-term trend, day of week and public holidays were adjusted.

∗: *P* < 0.05.

Table S6 The association between an increase of 1mg/m3 of CO and gout hospital admission in different subgroups (relative risk and 95% confidence interval)

| **lag** | **Male** | **Female** | **Aged<65 years** | **Aged≥65 years** | **Warm season** | **Cold season** |
| --- | --- | --- | --- | --- | --- | --- |
| 0 | 1.035(0.883-1.212) | 0.671(0.431-1.046) | 1.038(0.865-1.245) | 0.924(0.730-1.169) | 0.994(0.833-1.086) | 1.066(0.921-1.234) |
| 1 | 1.065(0.956-1.186) | 1.029(0.767-1.380) | 1.025(0.906-1.159) | 1.129(0.962-1.325) | 0.842(0.743-1.054) | 1.059(0.959-1.169) |
| 2 | 1.034(0.960-1.113) | 1.119(0.914-1.370) | 1.026(0.942-1.117) | 1.070(0.958-1.195) | 0.902(0.828-1.063) | 1.063(0.993-1.139) |
| 3 | 1.005(0.949-1.065) | 1.084(0.927-1.267) | 1.029(0.963-1.099) | 0.987(0.906-1.074) | 0.999(0.933-1.071) | 1.063(0.998-1.121) |
| 4 | 1.010(0.942-1.066) | 1.056(0.893-1.249) | 1.028(0.958-1.104) | 0.973(0.887-1.066) | 1.048(0.975-1.126) | 1.054(0.996-1.116) |
| 5 | 1.013(0.965-1.062) | 1.037(0.909-1.182) | 1.027(0.972-1.085) | 0.995(0.926-1.069) | 1.060(1.003-1.120) * | 1.042(0.995-1.090) |
| 6 | 1.026(0.986-1.067) | 1.027(0.921-1.145) | 1.027(0.981-1.075) | 1.025(0.966-1.087) | 1.058(1.012-1.106) * | 1.033(0.994-1.073) |
| 7 | 1.035(0.992-1.079) | 1.026(0.913-1.152) | 1.029(0.980-1.080) | 1.044(0.981-1.111) | 1.055(1.006-1.107) * | 1.030(0.989-1.072) |
| 8 | 1.040(0.995-1.087) | 1.032(0.913-1.167) | 1.033(0.981-1.086) | 1.051(0.984-1.122) | 1.053(1.001-1.109) * | 1.032(0.989-1.077) |
| 9 | 1.041(0.997-1.086) | 1.046(0.929-1.187) | 1.038(0.988-1.090) | 1.048(0.983-1.116) | 1.052(1.001-1.105) * | 1.040(0.998-1.084) |
| 10 | 1.039(0.999-1.080) | 1.066(0.957-1.187) | 1.045(0.999-1.090) | 1.036(0.978-1.098) | 1.051(1.004-1.099) * | 1.051(1.012-1.092) * |
| 11 | 1.035(0.998-1.073) | 1.090(0.986-1.206) | 1.053(1.010-1.098) * | 1.019(0.965-1.075) | 1.050(1.007-1.094) * | 1.066(1.029-1.105) * |
| 12 | 1.028(0.987-1.072) | 1.119(0.999-1.254) | 1.062(1.013-1.113) * | 0.996(0.937-1.059) | 1.049(1.001-1.099) * | 1.084(1.042-1.127) * |
| 13 | 1.021(0.967-1.078) | 1.151(0.992-1.337) | 1.071(1.007-1.140) * | 0.972(0.896-1.053) | 1.049(0.985-1.116) | 1.104(1.050-1.160) * |
| 14 | 1.013(0.942-1.090) | 1.186(0.971-1.448) | 1.081(0.995-1.176) | 0.946(0.849-1.054) | 1 .048(0.964-1.140) | 1.124(1.053-1.201) * |
| 0-0 | 1.035(0.883-1.212) | 0.671(0.431-1.046) | 1.038(0.865-1.245) | 0.924(0.730-1.169) | 0.994(0.833-1.086) | 1.066(0.921-1.234) |
| 0-1 | 1.092(0.931-1.282) | 0.681(0.433-1.070) | 1.065(0.886-1.281) | 1.016(0.801-1.289) | 0.861(0.713-1.039) | 1.134(0.978-1.315) |
| 0-2 | 1.110(0.938-1.315) | 0.769(0.476-1.242) | 1.097(0.902-1.333) | 1.040(0.809-1.337) | 0.799(0.654-0.978) | 1.221(1.041-1.432) * |
| 0-3 | 1.133(0.937-1.369) | 0.839(0.491-1.434) | 1.125(0.904-1.400) | 1.070(0.807-1.417) | 0.776(0.619-0.972) | 1.290(1.076-1.547) * |
| 0-4 | 1.160(0.941-1.429) | 0.888(0.492-1.601) | 1.153(0.906-1.467) | 1.104(0.809-1.506) | 0.780(0.608-1.000) | 1.345(1.067-1.649) * |
| 0-5 | 1.190(0.948-1.495) | 0.920(0.485-1.745) | 1.181(0.909-1.536) | 1.140(0.813-1.598) | 0.806(0.616-1.055) | 1.391(1.111-1.742) * |
| 0-6 | 1.225(0.957-1.567) | 0.943(0.471-1.886) | 1.213(0.913-1.611) | 1.176(0.816-1.695) | 0.849(0.636-1.133) | 1.434(1.120-1.835) * |
| 0-7 | 1.261(0.966-1.647) | 0.965(0.456-2.046) | 1.249(0.918-1.699) | 1.210(0.814-1.799) | 0.905(0.663-1.234) | 1.479(1.129-1.938) * |
| 0-8 | 1.300(0.974-1.736) | 0.995(0.441-2.424) | 1.292(0.927-1.803) | 1.241(0.808-1.905) | 0.969(0.694-1.354) | 1.532(1.141-2.058) * |
| 0-9 | 1.341(0.983-1.829) | 1.039(0.434-2.489) | 1.344(0.940-1.923) | 1.265(0.798-2.006) | 1.039(0.727-1.485) | 1.600(1.163-2.201) * |
| 0-10 | 1.382(0.993-1.923) | 1.105(0.436-2.803) | 1.407(0.962-2.059) | 1.282(0.785-2.094) | 1.109(0.760-1.620) | 1.689(1.200-2.376) * |
| 0-11 | 1.424(1.006-2.017) | 1.203(0.451-3.211) | 1.484(0.993-2.216) | 1.290(0.769-2.163) | 1.175(0.790-1.749) | 1.804(1.256-2.593) * |
| 0-12 | 1.466(1.019-2.111) | 1.346(0.482-3.762) | 1.576(1.036-2.398) * | 1.288(0.750-2.213) | 1.232(0.813-1.867) | 1.956(1.335-2.865) * |
| 0-13 | 1.509(1.030-2.210) | 1.550(0.528-4.550) | 1.687(1.087-2.620) * | 1.276(0.724-2.250) | 1.276(0.825-1.973) | 2.152(1.439-3.217) * |
| 0-14 | 1.551(1.034-2.324) | 1.838(0.587-5.757) | 1.821(1.142-2.905) * | 1.254(0.687-2.287) | 1.304(0.820-2.074) | 2.405(1.571-3.683) * |

In CO model, SO2, O3, long-term trend, day of week and public holidays were adjusted.

∗: *P* < 0.05.

Figure S1. Spearman's correlation coefficients between the different meteorological factors and air pollutants.


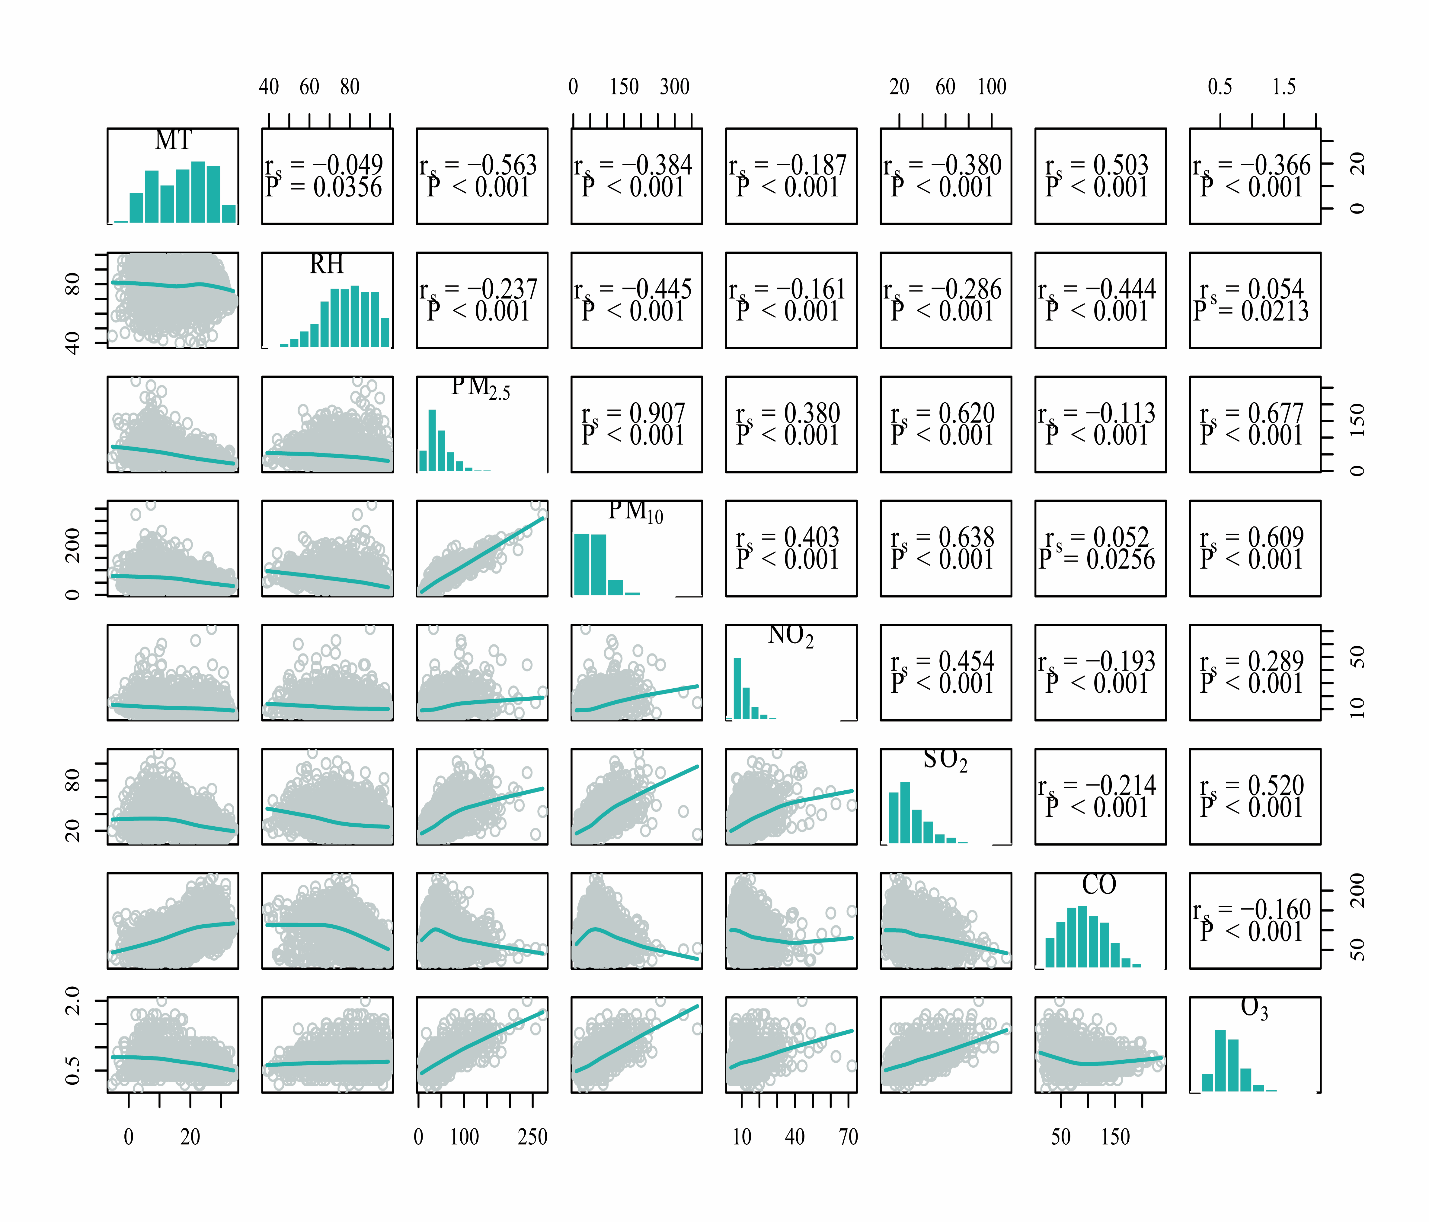


FigureS2 Concentration-response relationship curve for NO2, CO and O3 levels with daily hospitalizations for acute gout flares


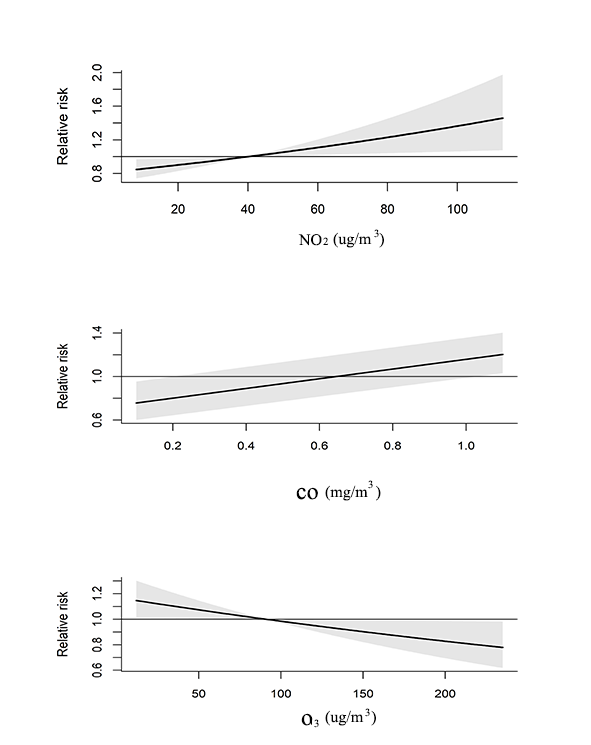


FigureS3 The relative risk of hospitalizations for gout along with PM2.5, PM10 and SO2.The solid red line represents the estimated risk of hospitalizations for gout, and the shaded area represents the 95% confidence interval for each estimate.


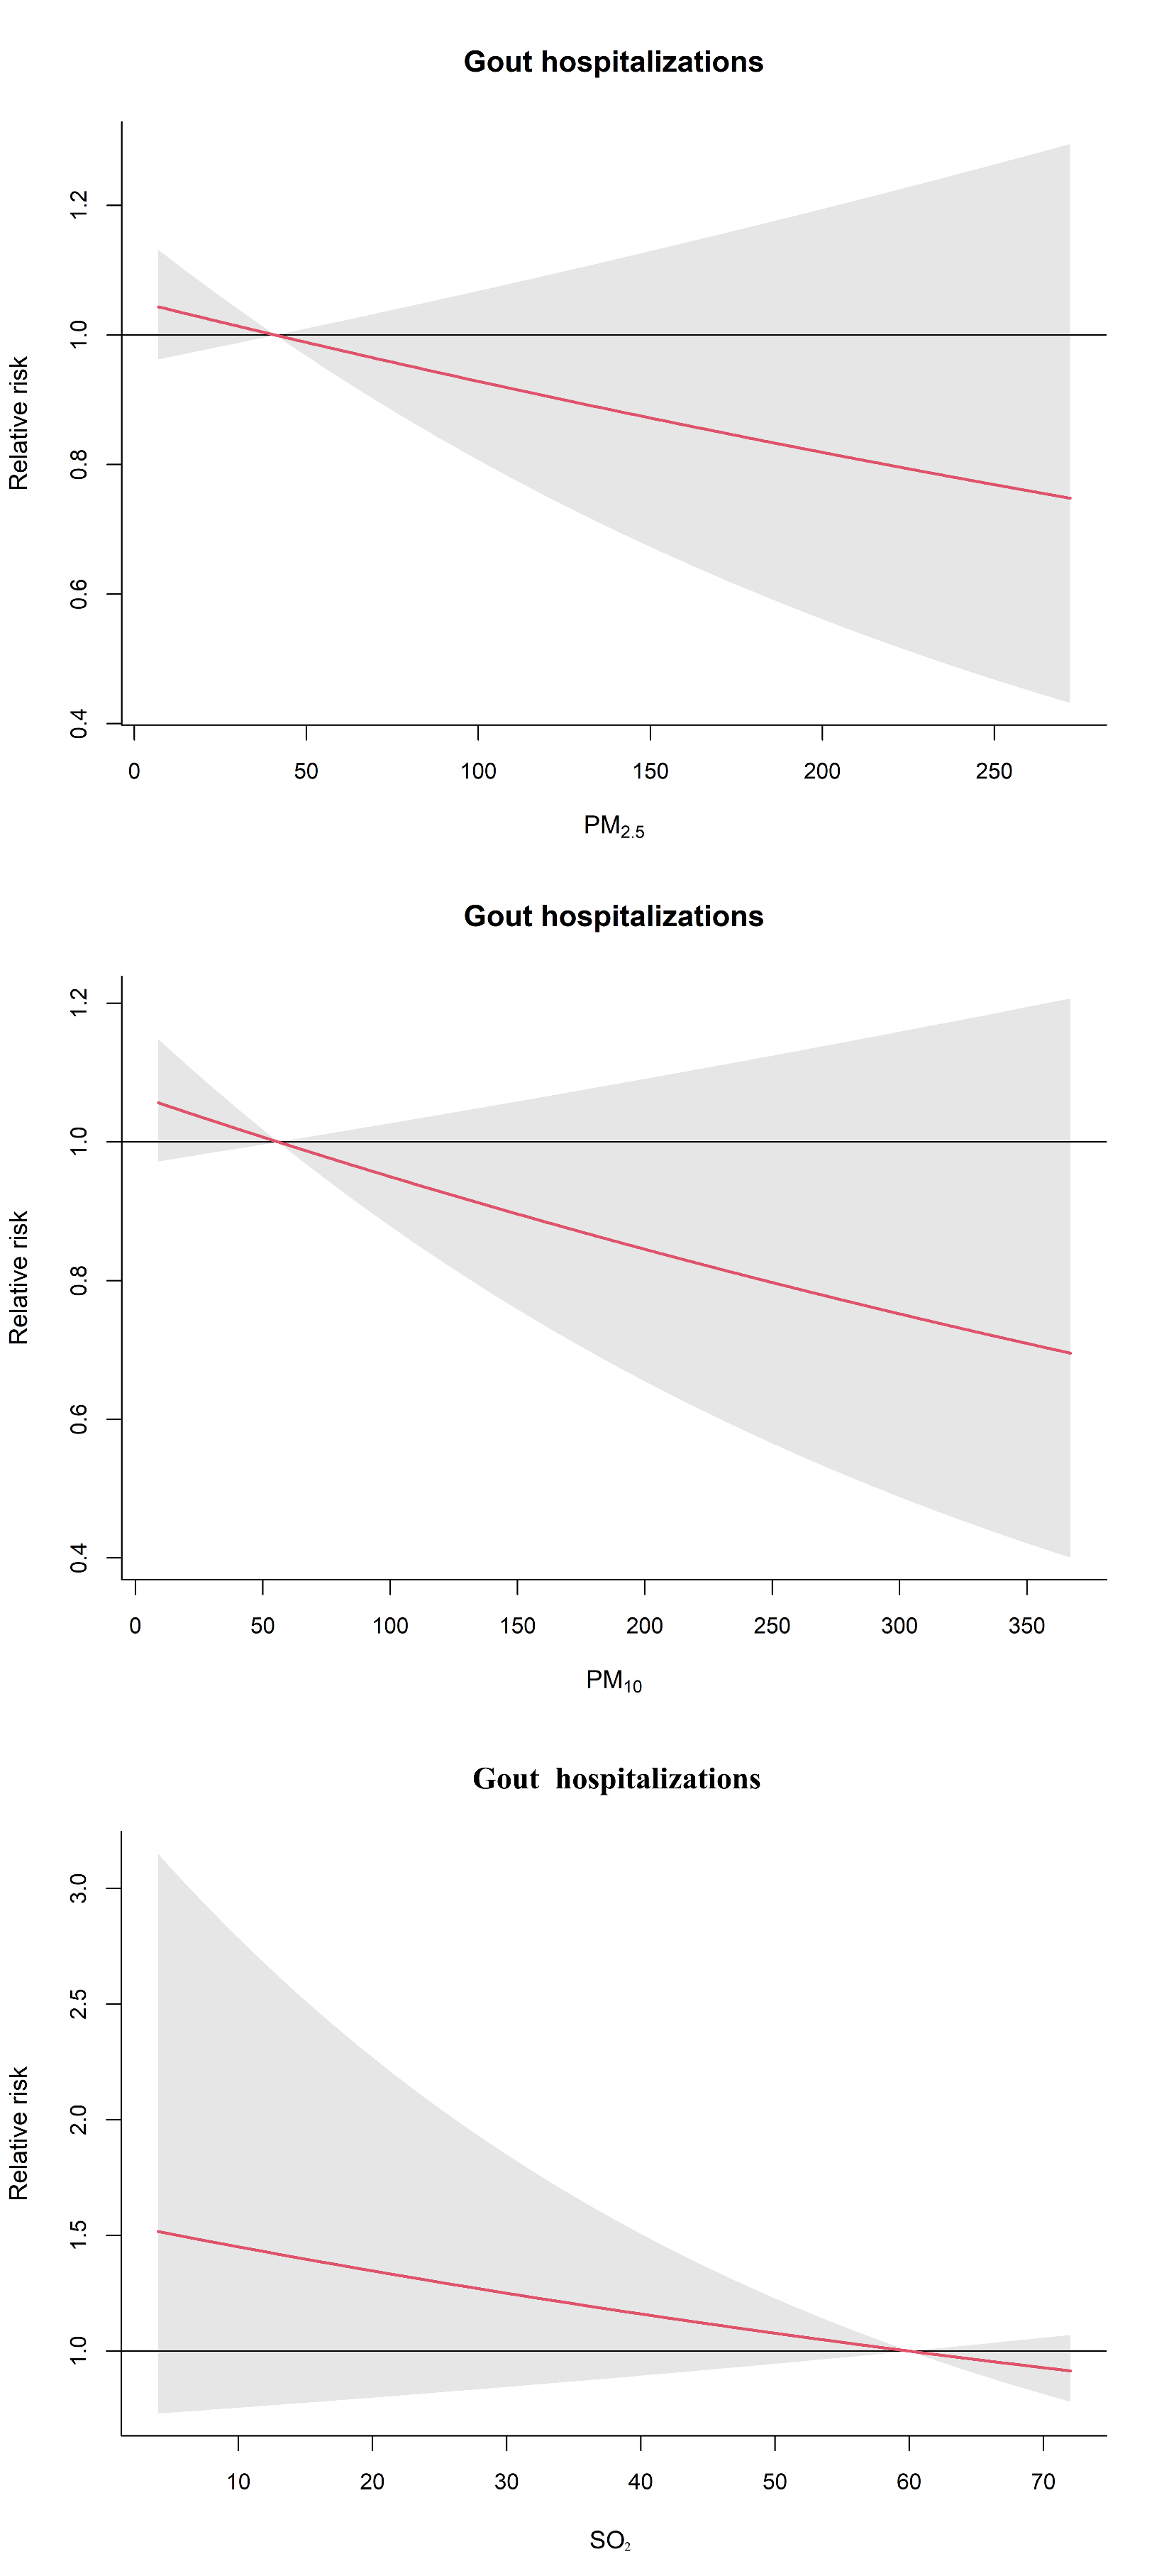


FigureS4 The single-day association between an increase of 10ug/m3 of NO2 and gout when varying the degrees of freedom (3-5*dfs*) for PM2.5, PM10, SO2, Rehumidity and the df (6-8 *dfs*/year) for time.


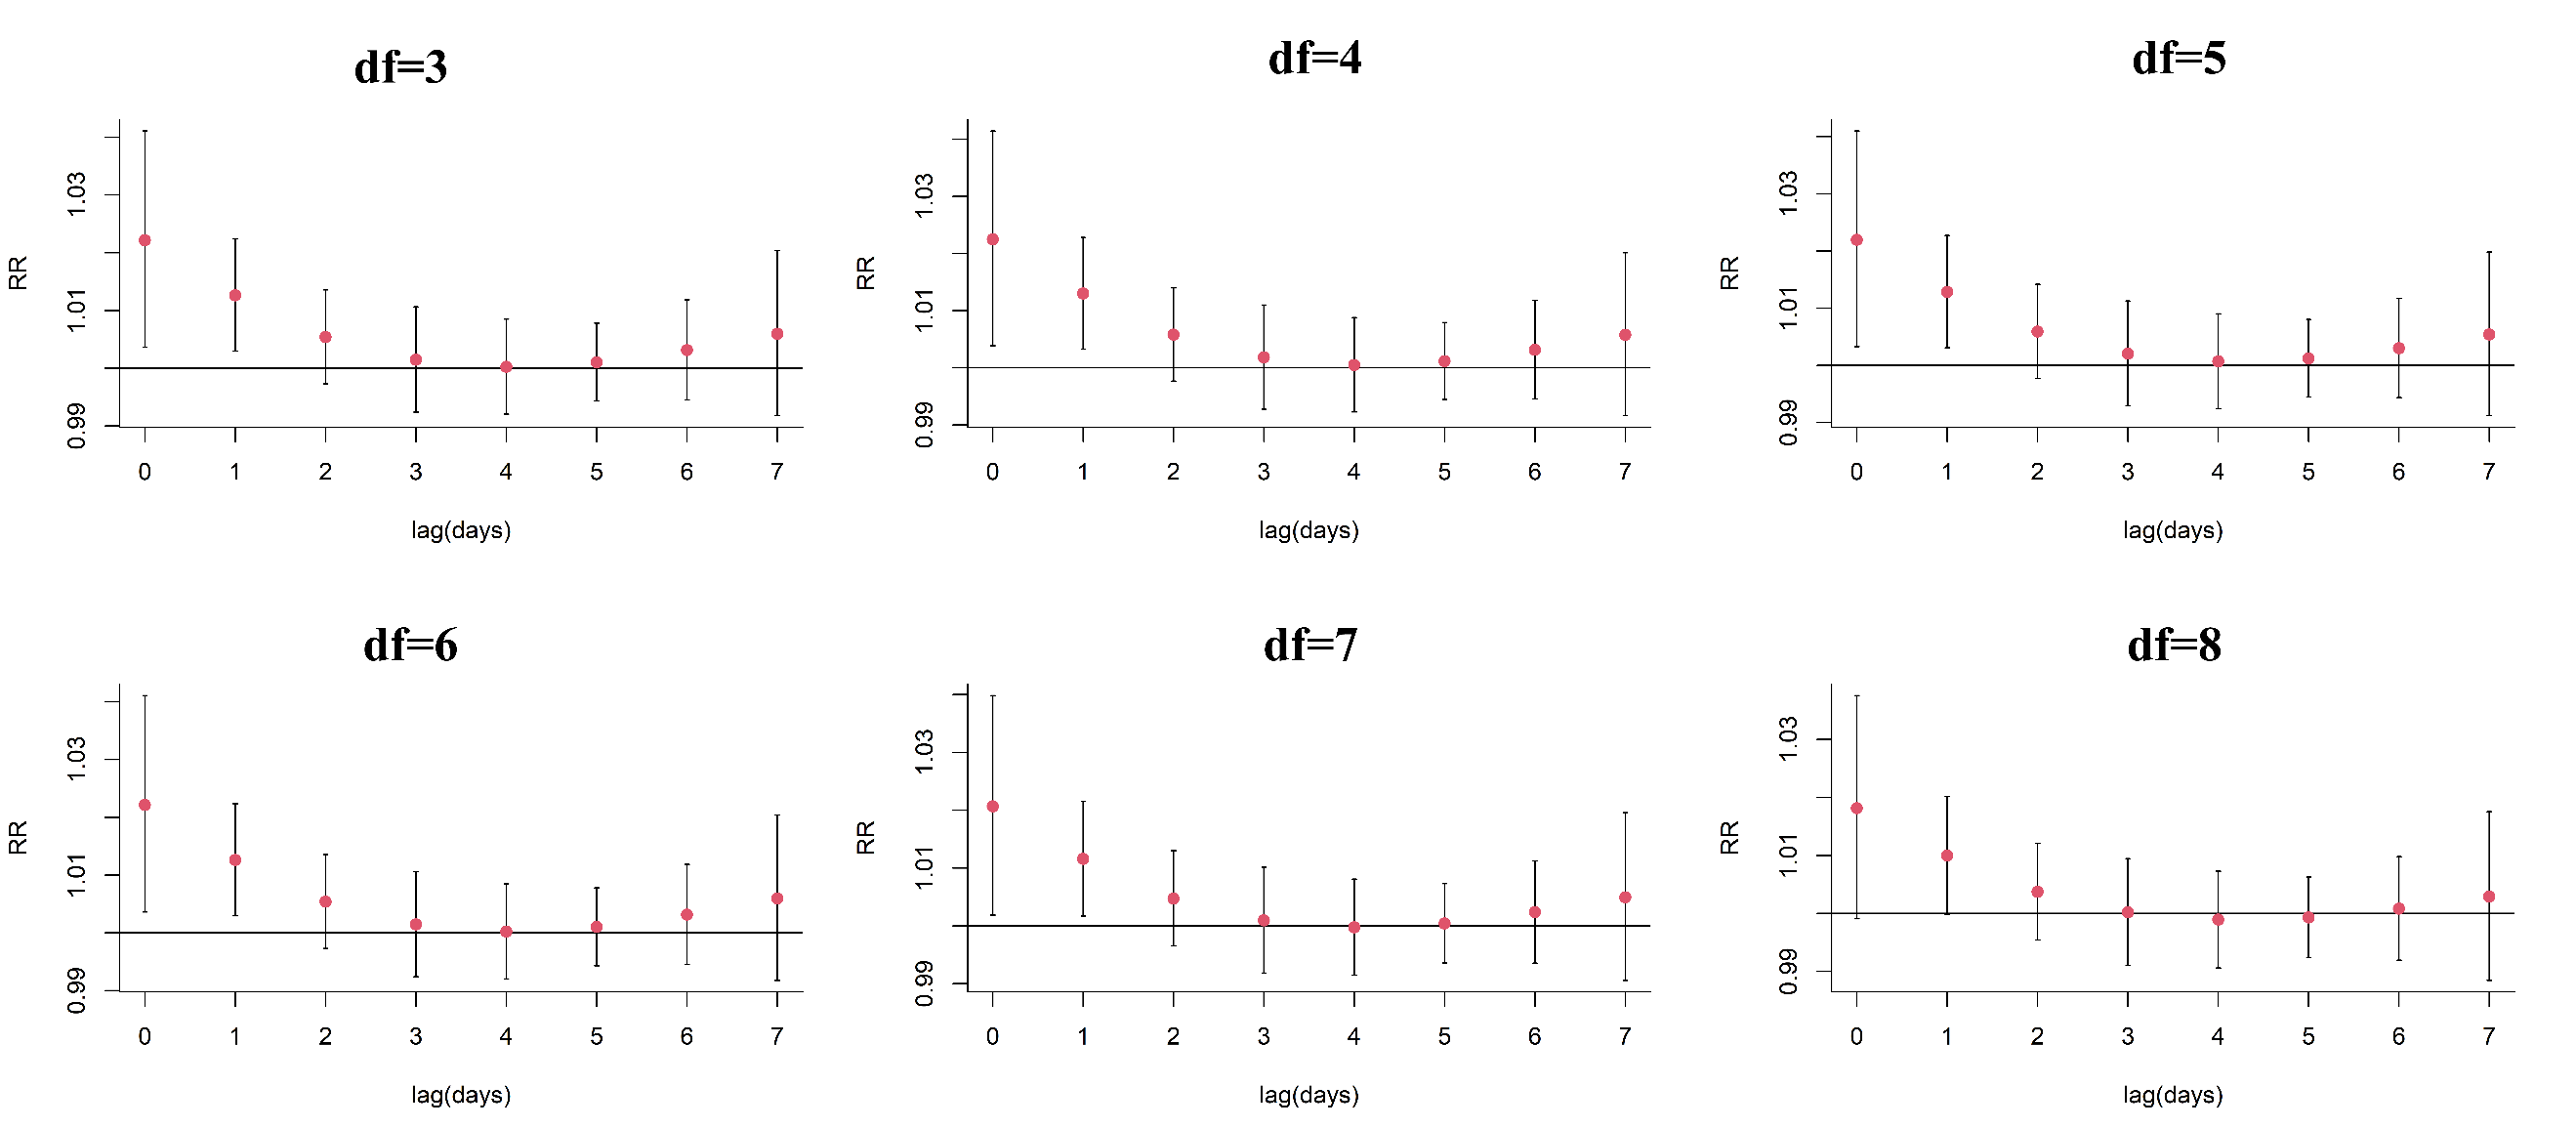


FigureS5 The single-day association between an increase of 10ug/m3 of O3 and gout when varying

the degrees of freedom (3-5*dfs*) for CO, Meantem, Rehumidity and the df (6-8*dfs*/year) for time.


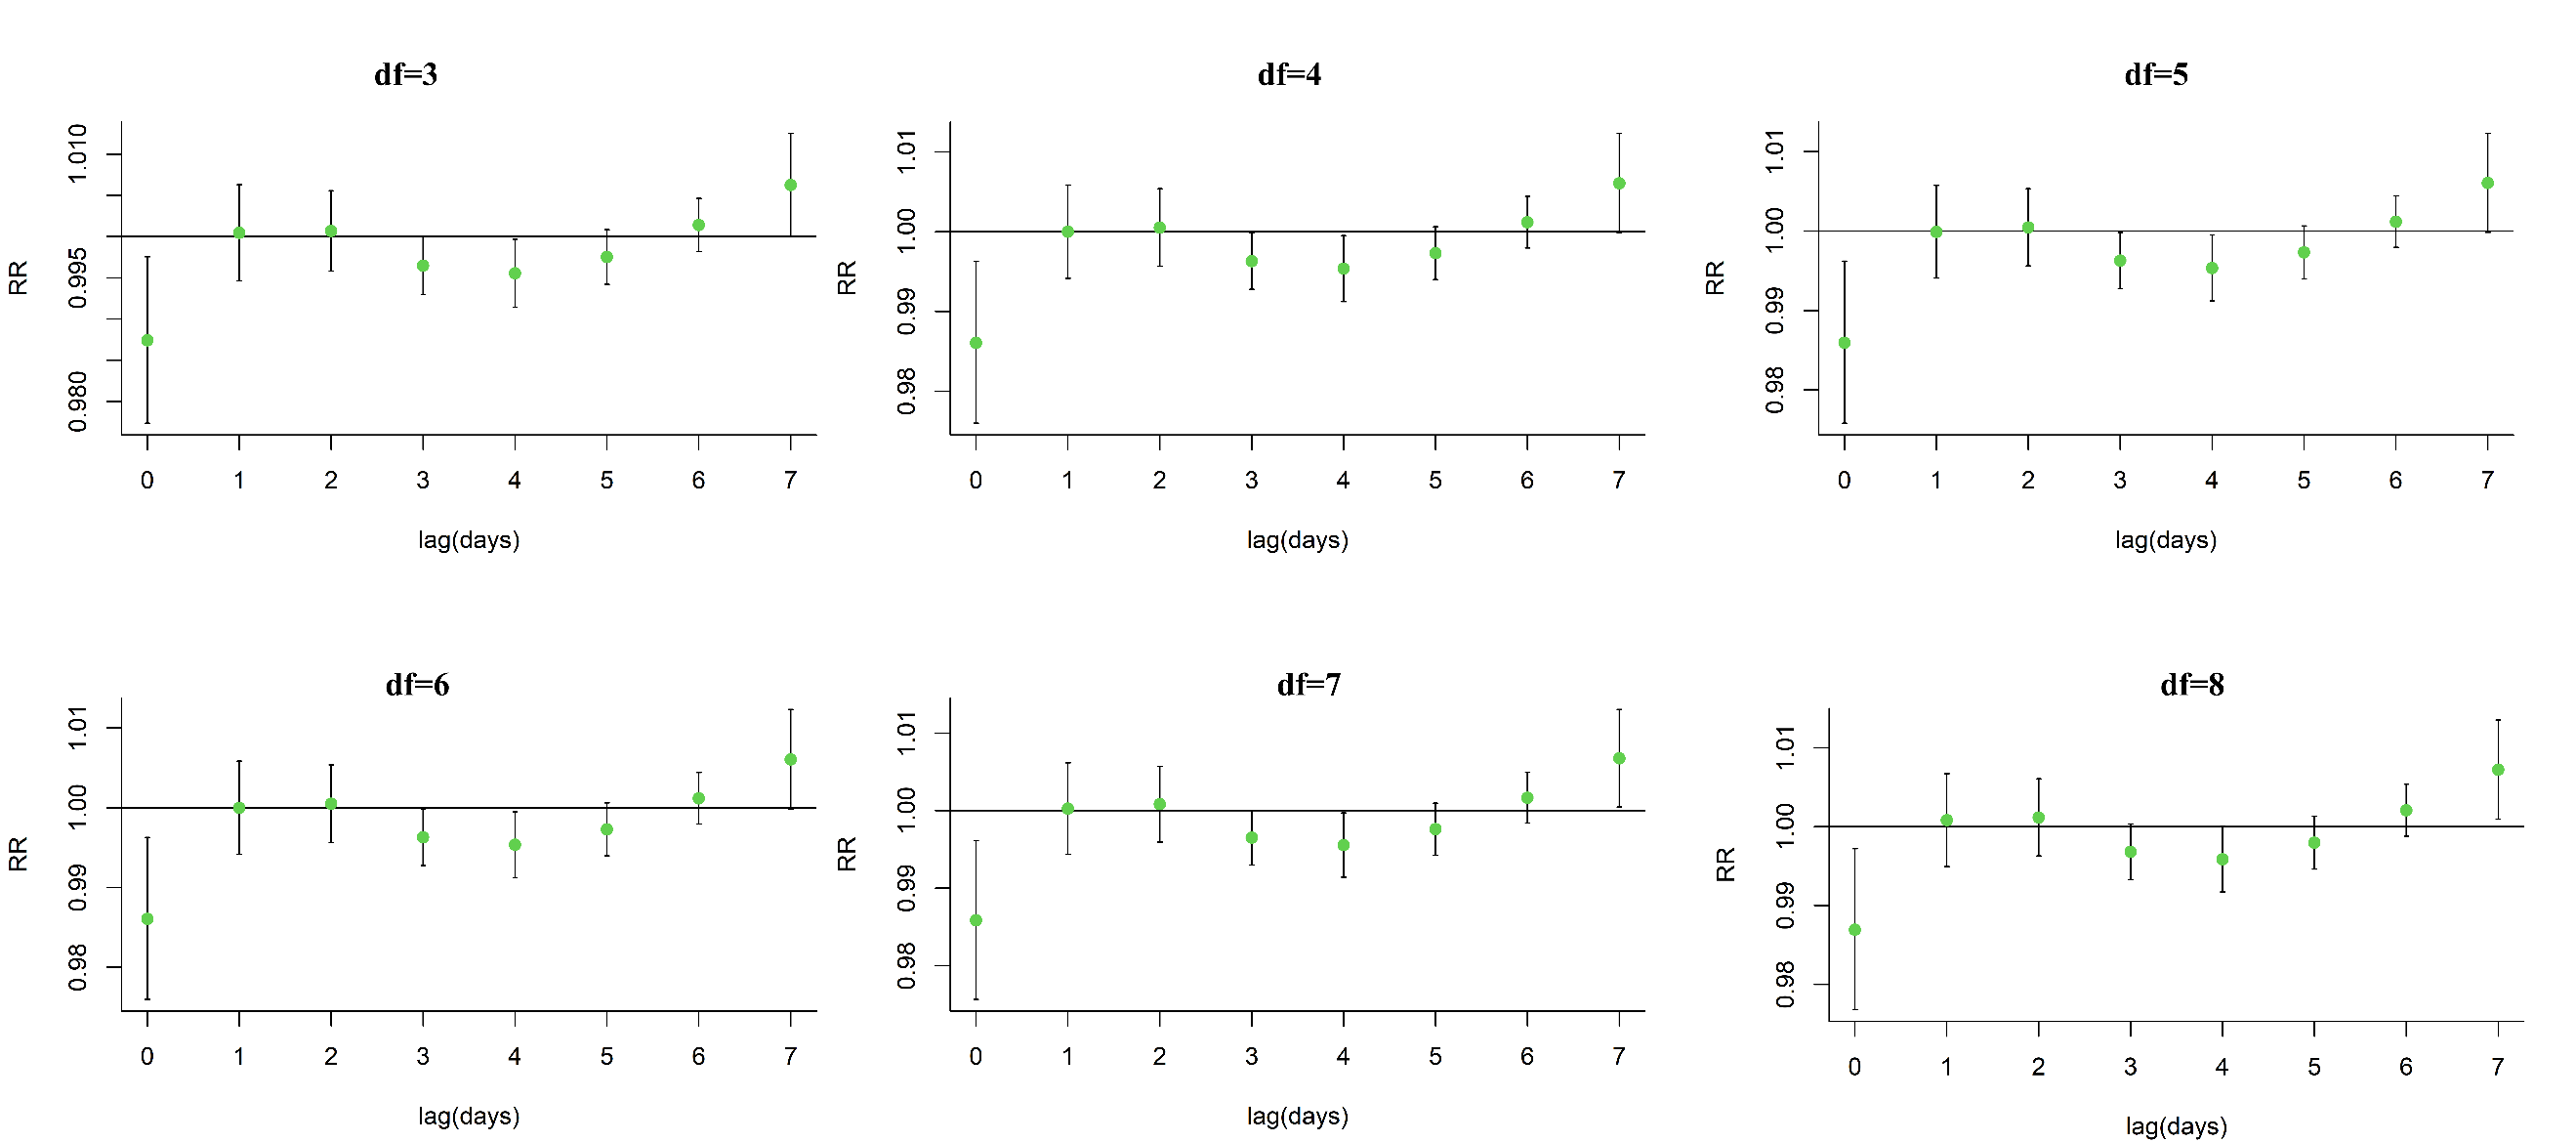


FigureS6 The single-day association between an increase of 1mg/m3 of CO and gout when varying the degrees of freedom (3-5*dfs*) for O3, SO2and the df (6-8*dfs*/year) for time.


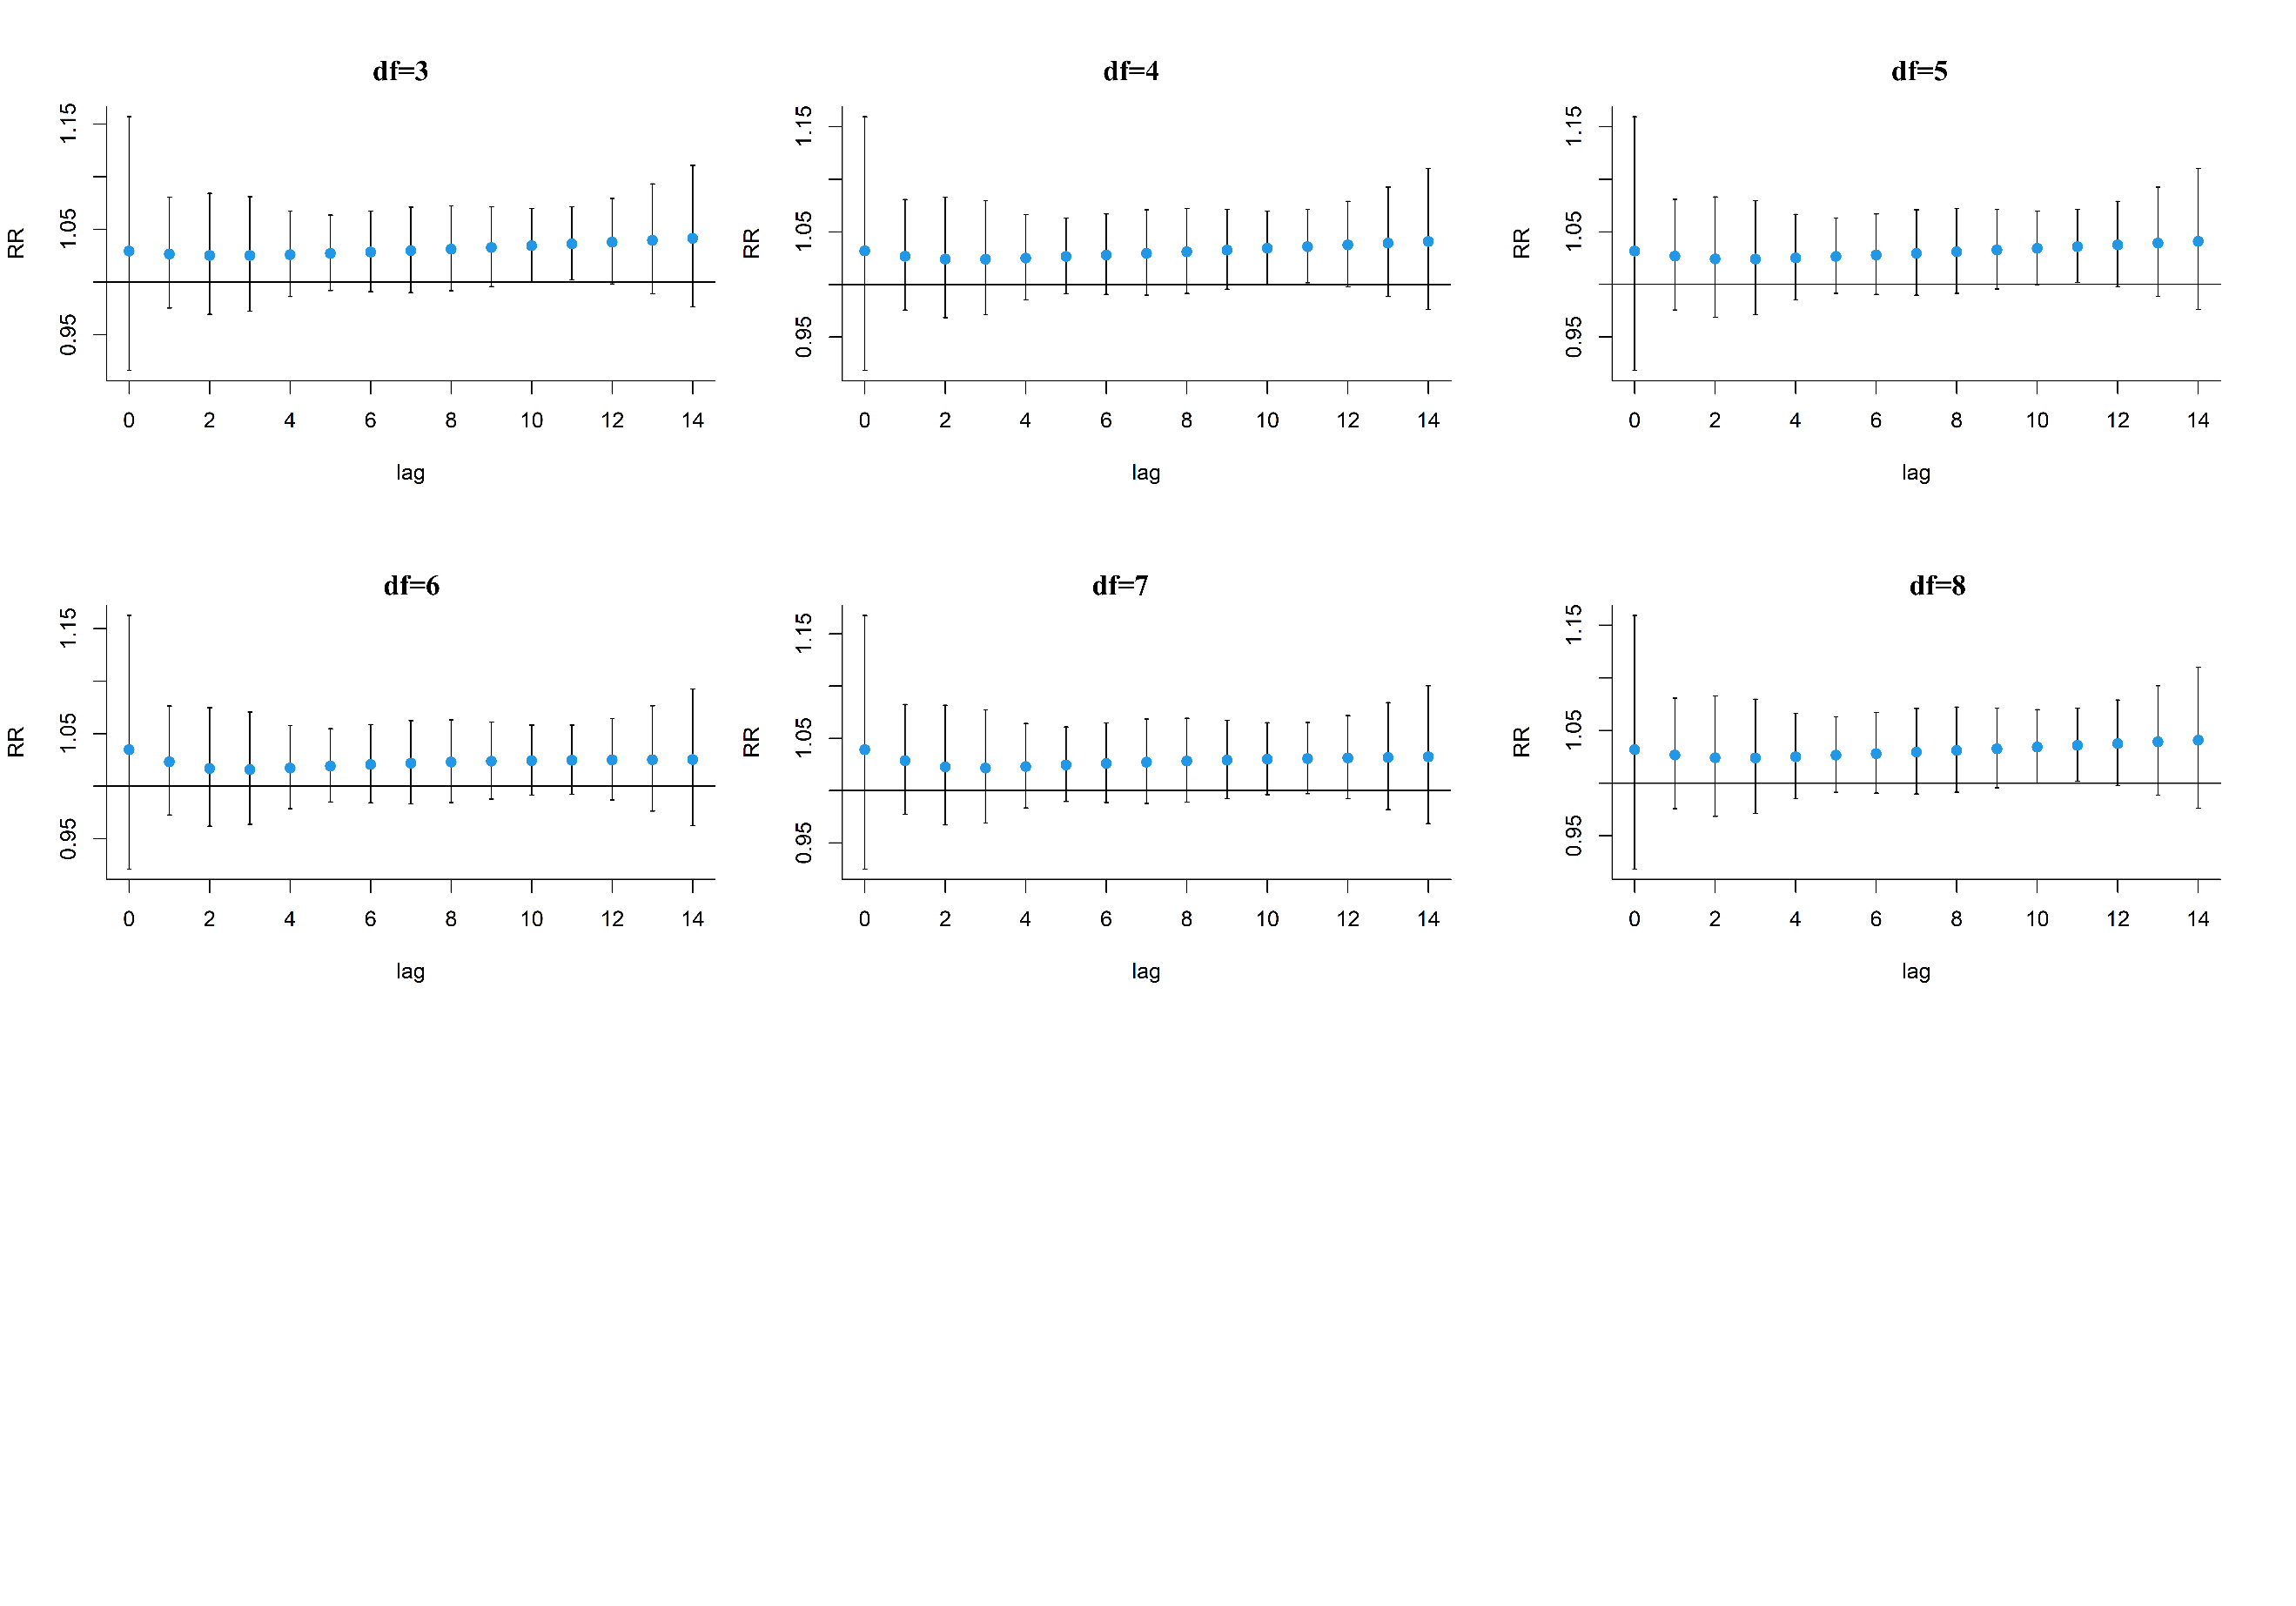

Supplement: Supplementary file 1 [file get_supplementary_file.php]
